# Supplementary material
Source: Royal Society of Chemistry journal article supplement (doi:10.1039/d6nr00856a)

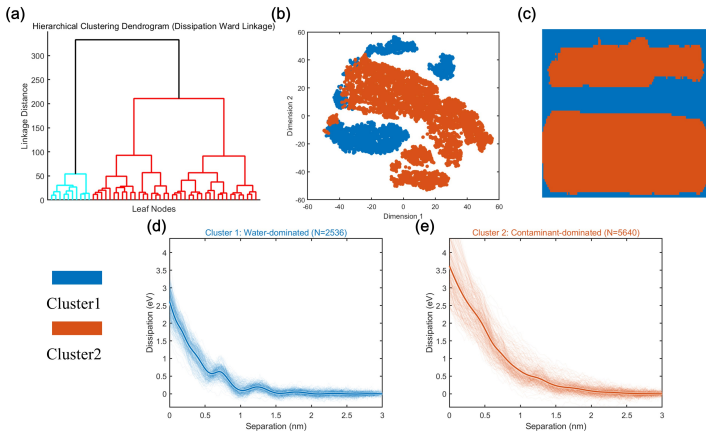

Supplement: d6nr00856a10.pdf [file d6nr00856a10.pdf]

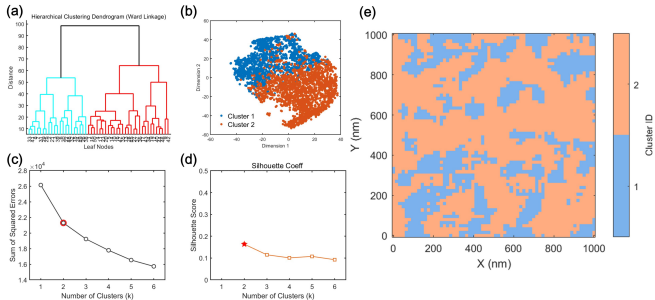

Supplement: d6nr00856a11.pdf [file d6nr00856a11.pdf]

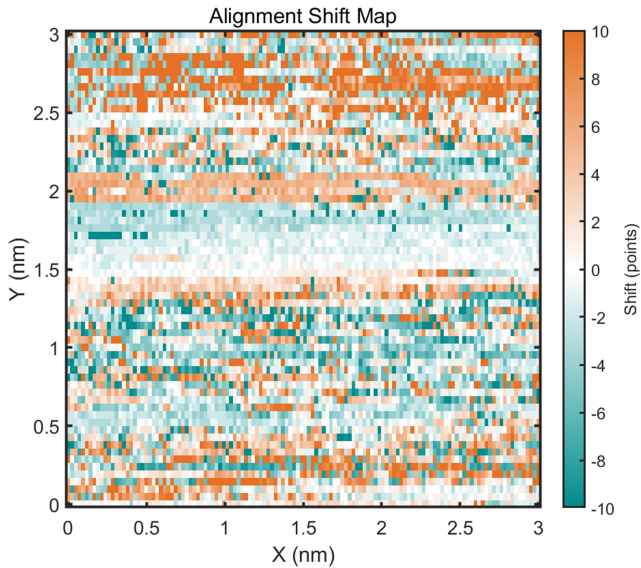

Supplement: d6nr00856a12.pdf [file d6nr00856a12.pdf]

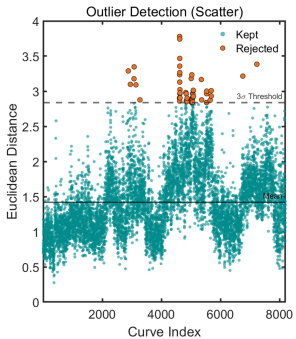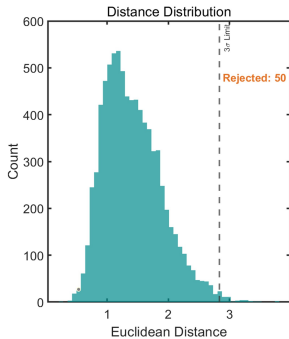

Supplement: d6nr00856a13.pdf [file d6nr00856a13.pdf]

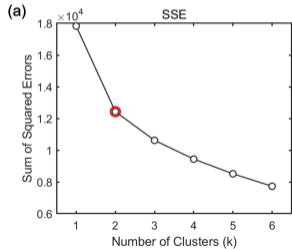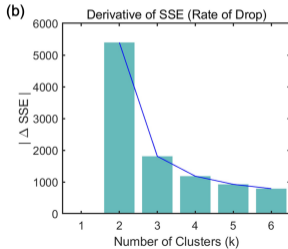

Supplement: d6nr00856a14.pdf [file d6nr00856a14.pdf]

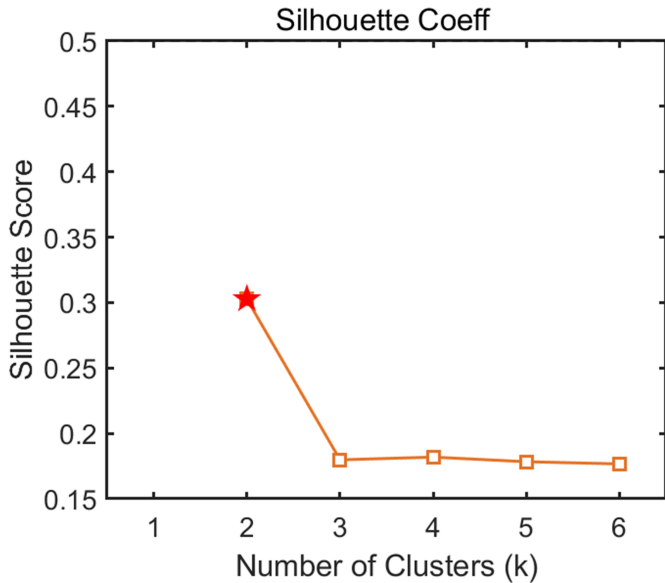

Supplement: d6nr00856a15.pdf [file d6nr00856a15.pdf]

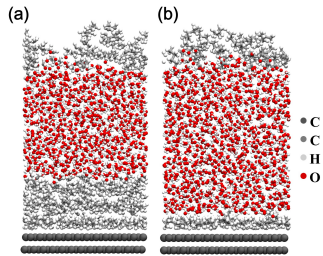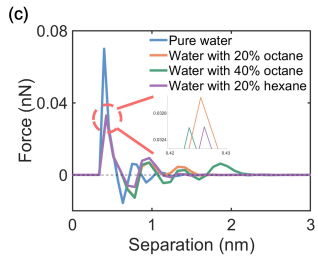

Supplement: d6nr00856a16.pdf [file d6nr00856a16.pdf]

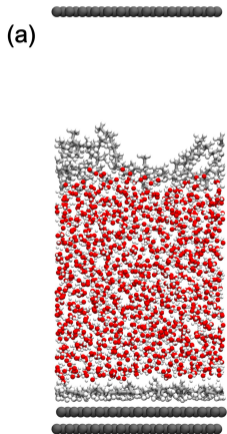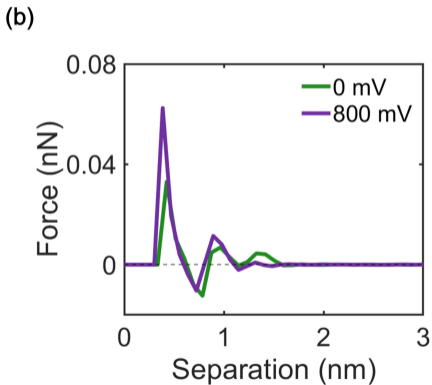

Supplement: d6nr00856a17.pdf [file d6nr00856a17.pdf]

### Comparison of Cluster 2 Solvation Forces

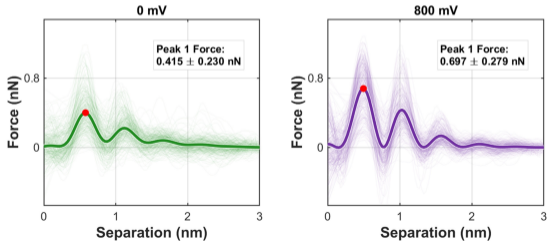

Supplement: d6nr00856a18.pdf [file d6nr00856a18.pdf]

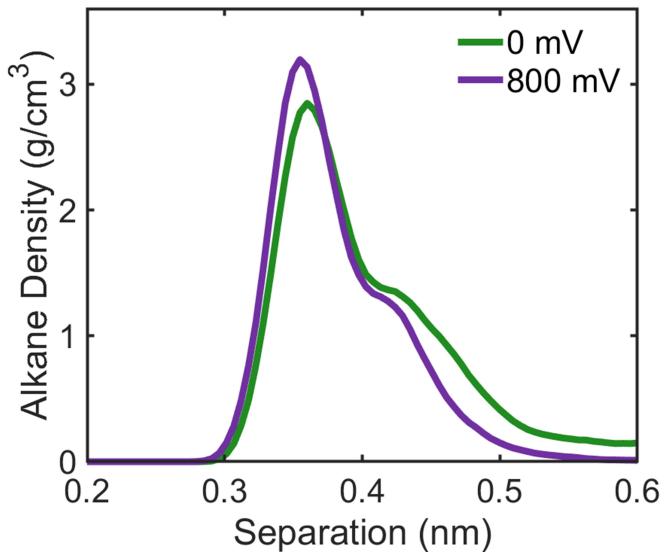

Supplement: d6nr00856a19.pdf [file d6nr00856a19.pdf]

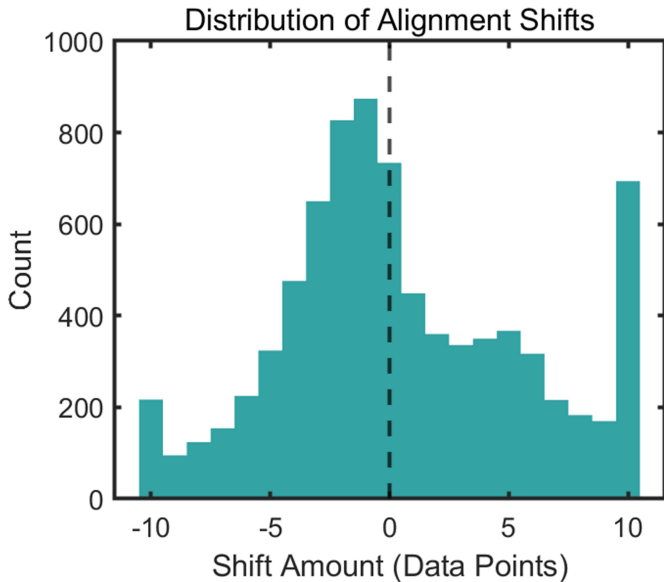

Supplement: d6nr00856a2.pdf [file d6nr00856a2.pdf]

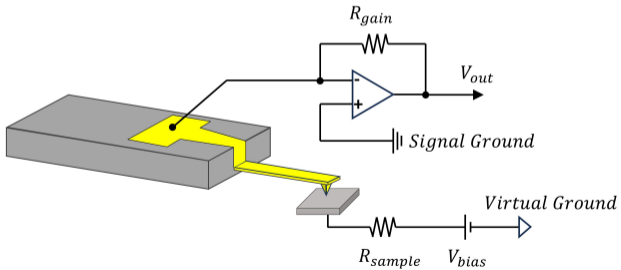

Supplement: d6nr00856a3.pdf [file d6nr00856a3.pdf]

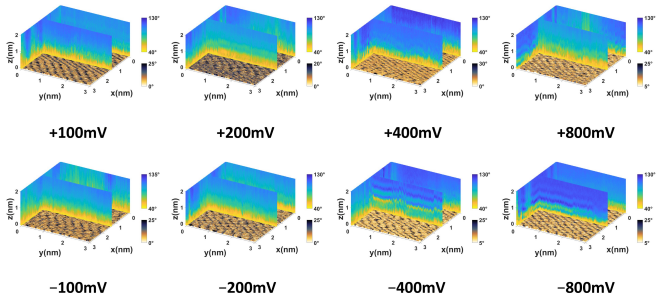

Supplement: d6nr00856a4.pdf [file d6nr00856a4.pdf]

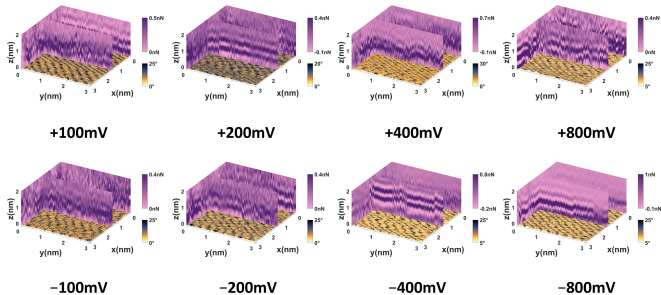

Supplement: d6nr00856a5.pdf [file d6nr00856a5.pdf]

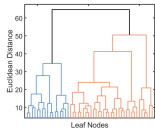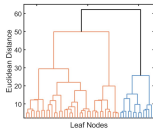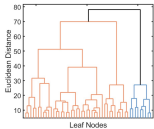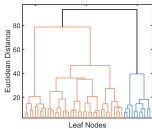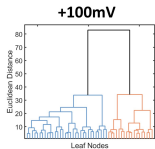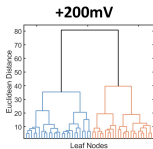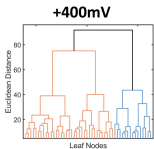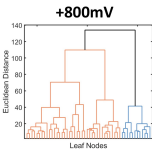

**+100mV**

**+200mV**

**+400mV**

**+800mV**

**-100mV**

**-200mV**

**-400mV**

**-800mV**

Supplement: d6nr00856a6.pdf [file d6nr00856a6.pdf]

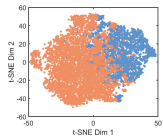

**+100mV**

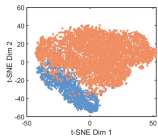

**+200mV**

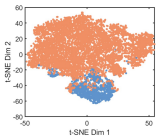

**+400mV**

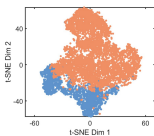

**+800mV**

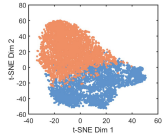

**-100mV**

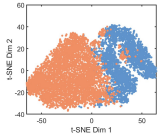

**-200mV**

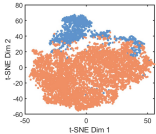

**-400mV**

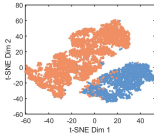

**-800mV**

Supplement: d6nr00856a7.pdf [file d6nr00856a7.pdf]

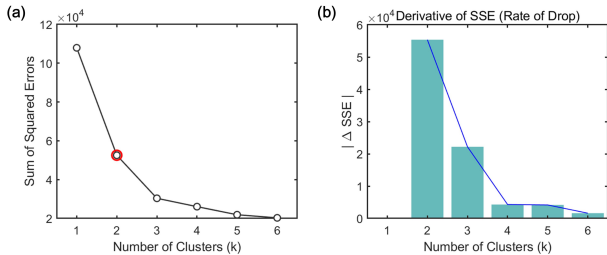

Supplement: d6nr00856a8.pdf [file d6nr00856a8.pdf]

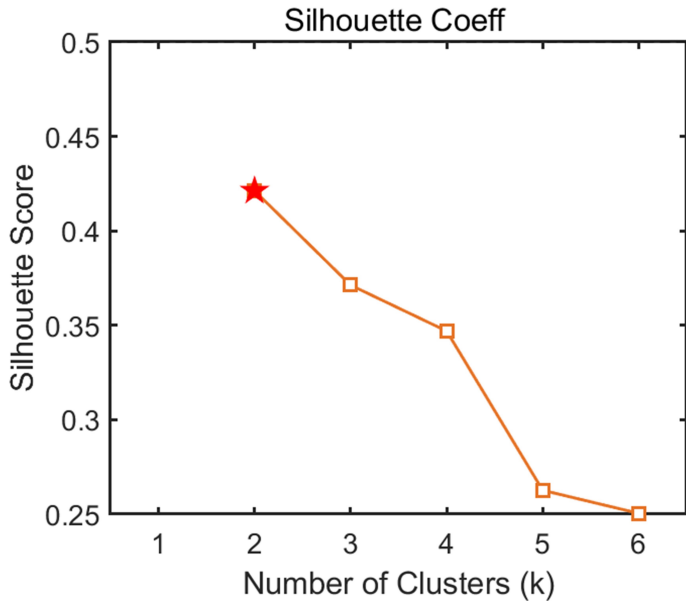

Supplement: d6nr00856a9.pdf [file d6nr00856a9.pdf]
